# Supplementary material for: A New Dimeric Copper(II) Complex of Hexyl Bis(pyrazolyl)acetate Ligand as an Efficient Catalyst for Allylic Oxidations
Source: MDPI journal article supplement (doi:10.3390/molecules26206271), 2021-10-16
Supplement: s1 [file s1]

Supporting Information

# A new dimeric copper(II) complex of hexyl bis(pyrazolyl)acetate ligand as efficient catalyst for allylic oxidations

Luca Bagnarelli <sup>1</sup>, Alessandro Dolmella <sup>2</sup>, Carlo Santini <sup>1</sup>, Riccardo Vallesi <sup>1</sup>, Roberto Giacomantonio <sup>1</sup>,  
Serena Gabrielli <sup>1,\*</sup> and Maura Pellei <sup>1,\*</sup>

<sup>1</sup> School of Science and Technology, Chemistry Division, University of Camerino, via S. Agostino 1, 62032 Camerino, Italy; luca.bagnarelli@unicam.it (L.B.); carlo.santini@unicam.it (C.S.); riccardo.vallesi@unicam.it (R.V.); robert.giacomantonio@unicam.it (R.G.)

<sup>2</sup> Department of Pharmaceutical and Pharmacological Sciences, University of Padova, via Marzolo 5, 35131 Padova, Italy; alessandro.dolmella@unipd.it

\* Correspondence: serena.gabrielli@unicam.it (S.G.); maura.pellei@unicam.it (M.P.);  
Tel.: +39-0737-402219 (S.G.); +39-0737-402213 (M.P.)

## Contents

**Table S1:** Summary of crystal data and structure refinement for compound **1**.

**Table S2:** Intermolecular contacts in **1**.

**Figure S1:** ORTEP drawing of the asymmetric unit of **1**, showing part of the selected numbering scheme.

**Figure S2:** ORTEP representation of the dimeric complex **1** showing part of the selected numbering scheme.

**Figure S3:** Packing diagrams for **1**.

**Figure S4:** <sup>1</sup>H-NMR of HC(COOHex)(pz)<sub>2</sub> (L<sup>OHex</sup>) in CDCl<sub>3</sub>.

**Figure S5:** <sup>13</sup>C-NMR of HC(COOHex)(pz)<sub>2</sub> (L<sup>OHex</sup>) in CDCl<sub>3</sub>.

**Figure S6:** FT-IR spectrum of HC(COOHex)(pz)<sub>2</sub> (L<sup>OHex</sup>).

**Figure S7:** ESI-MS(+) spectrum of HC(COOHex)(pz)<sub>2</sub> (L<sup>OHex</sup>).

**Figure S8:** FT-IR spectrum of [Cu(L<sup>OHex</sup>)Br(μ-Br)]<sub>2</sub> (**1**).

**Figure S9:** ESI-MS(+) spectrum of [Cu(L<sup>OHex</sup>)Br(μ-Br)]<sub>2</sub> (**1**).

**Figure S10:** <sup>1</sup>H-NMR of compound **4** in CDCl<sub>3</sub>.

**Figure S11:** <sup>13</sup>C-NMR of compound **4** in CDCl<sub>3</sub>.

**Figure S12:** FT-IR spectrum of compound **4**.

**Figure S13:** <sup>1</sup>H-NMR of compound **5** in CDCl<sub>3</sub>.

**Figure S14:** <sup>13</sup>C-NMR of compound **5** in CDCl<sub>3</sub>.

**Figure S15:** FT-IR spectrum of compound **5**.

**Figure S16:** <sup>1</sup>H-NMR of compound **6** in CDCl<sub>3</sub>.

**Figure S17:** <sup>13</sup>C-NMR of compound **6** in CDCl<sub>3</sub>.

**Figure S18:** FT-IR spectrum of compound **6**.

**Table S1.** Summary of crystal data and structure refinement for compound **1**.

| Empirical formula                                            | <b>C<sub>14</sub>H<sub>20</sub>N<sub>4</sub>O<sub>2</sub>CuBr<sub>2</sub></b> |
|--------------------------------------------------------------|-------------------------------------------------------------------------------|
| Formula weight                                               | 499.70                                                                        |
| Temperature / K                                              | 296.9(9)                                                                      |
| Crystal system                                               | monoclinic                                                                    |
| Space group                                                  | <i>P</i> 2 <sub>1</sub> / <i>c</i>                                            |
| <i>a</i> / Å                                                 | 13.0171(4)                                                                    |
| <i>b</i> / Å                                                 | 9.8111(2)                                                                     |
| <i>c</i> / Å                                                 | 15.8632(4)                                                                    |
| $\alpha$ / °                                                 | 90                                                                            |
| $\beta$ / °                                                  | 110.248(3)                                                                    |
| $\gamma$ / °                                                 | 90                                                                            |
| Volume / Å <sup>3</sup>                                      | 1900.73(9)                                                                    |
| <i>Z</i>                                                     | 4                                                                             |
| $\rho_{\text{calc}}$ g/cm <sup>3</sup>                       | 1.746                                                                         |
| $\mu$ / mm <sup>-1</sup>                                     | 5.366                                                                         |
| <i>F</i> (000)                                               | 988.0                                                                         |
| Crystal size / mm <sup>3</sup>                               | 0.6 × 0.4 × 0.01                                                              |
| Radiation                                                    | Mo K $\alpha$ ( $\lambda$ = 0.71073)                                          |
| Index ranges                                                 | −15 ≤ <i>h</i> ≤ 17, −13 ≤ <i>k</i> ≤ 12, −19 ≤ <i>l</i> ≤ 20                 |
| Reflections collected                                        | 22513                                                                         |
| Independent reflections / <i>R</i> <sub>int</sub>            | 4228 / 0.0437                                                                 |
| Data / restraints / parameters                               | 4228 / 78 / 293                                                               |
| Goodness-of-fit on <i>F</i> <sup>2</sup>                     | 1.058                                                                         |
| Final <i>R</i> indexes [ <i>I</i> ≥ 2 $\sigma$ ( <i>I</i> )] | <i>R</i> <sub>1</sub> = 0.0351, <i>wR</i> <sub>2</sub> = 0.0666               |
| Largest diff. peak / hole / e Å <sup>-3</sup>                | 0.50 / −0.46                                                                  |

<sup>a</sup> Goodness-of-fit =  $[\sum w (F_o^2 - F_c^2)^2 / (N_{\text{obs}} - N_{\text{params}})]^{1/2}$ , based on all data; <sup>b</sup>  $R_1 = \sum ||F_o| - |F_c|| / \sum |F_o|$ ; <sup>c</sup>  $wR_2 = [\sum w (F_o^2 - F_c^2)^2 / \sum w (F_o^2)^2]^{1/2}$ .

**Table S2.** Intermolecular contacts in **1**.

| Atom (A) | Atom (B) | A...B (Å) | Symmetry <sup>a</sup>                           |
|----------|----------|-----------|-------------------------------------------------|
| C(8)     | Br(1)    | 3.37      | 1 − <i>x</i> , −1/2 + <i>y</i> , 3/2 − <i>z</i> |
| C(7)     | Br(1)    | 3.43      | 1 − <i>x</i> , −1/2 + <i>y</i> , 3/2 − <i>z</i> |
| H(7)     | Br(1)    | 2.91      | 1 − <i>x</i> , −1/2 + <i>y</i> , 3/2 − <i>z</i> |
| H(1)     | Br(1)    | 2.93      | <i>x</i> , −1 + <i>y</i> , <i>z</i>             |

<sup>a</sup> Symmetry operator of B atom; atom A belongs to asymmetric unit.

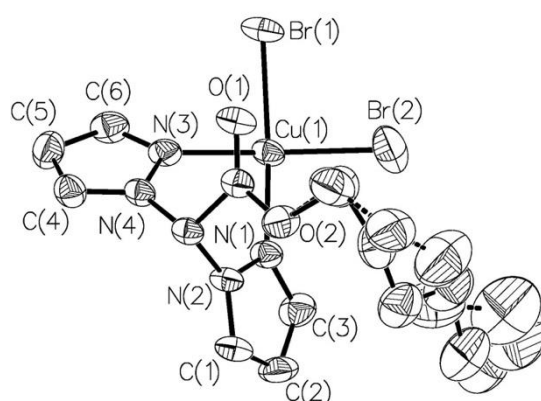

**Figure S1.** ORTEP drawing of the asymmetric unit of **1**, showing part of the selected numbering scheme. Hydrogen atoms omitted for clarity. The alternate arrangement of the disordered hexyloxy chain has dashed bonds. Thermal ellipsoids drawn at the 50% probability level.

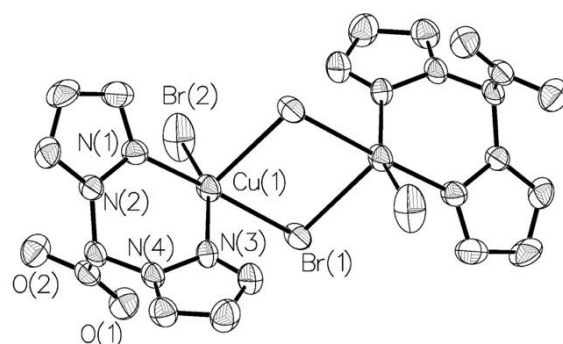

**Figure S2.** An ORTEP representation of the dimeric complex **1** showing part of the selected numbering scheme. Hydrogen atoms and disordered hexyloxy chains removed for clarity. Thermal ellipsoids drawn at the 50% probability level.

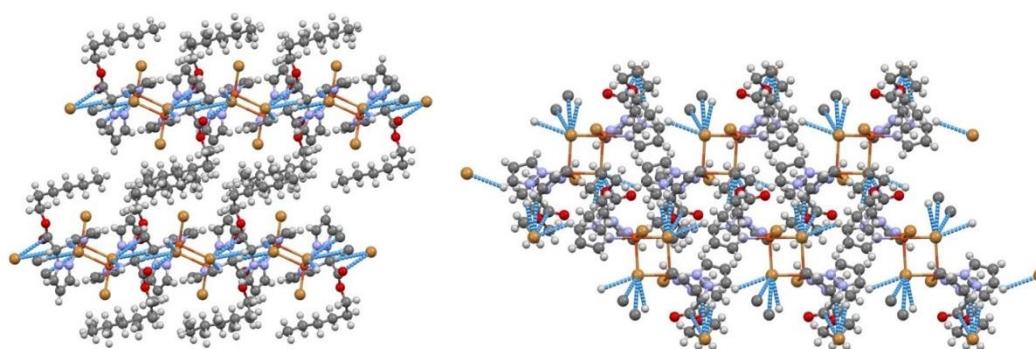

**Figure S3.** Packing diagrams for **1**. Left: the bi-dimensional network developing in the *bc* plane (view down the *a* axis). Right: the 'sandwich' motif created by the planes incorporating the hexyl aliphatic chains and the part of the molecules containing the  $\text{Cu}_2\text{Br}_2$  tetramers developing along the *a* axis. Contacts colored in cyan.

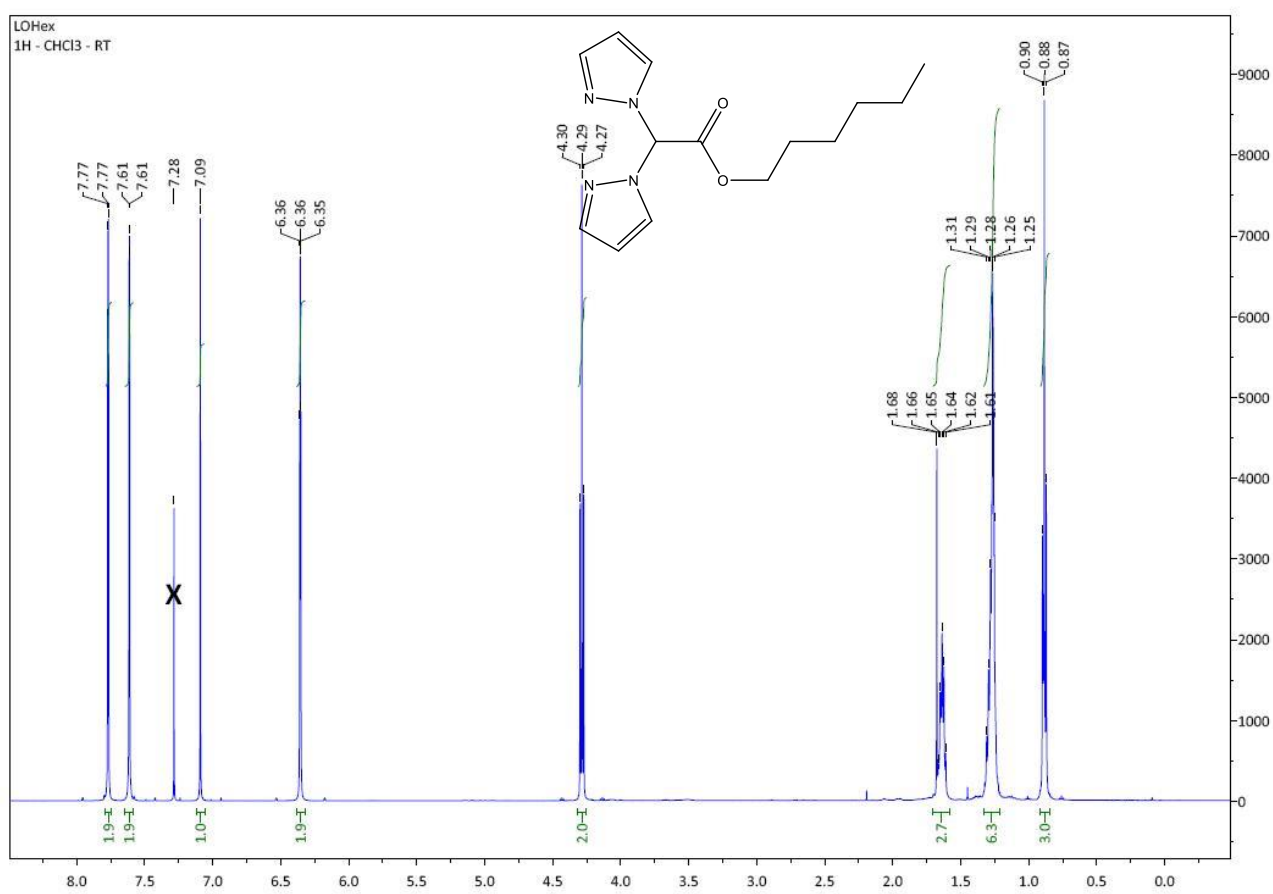

**Figure S4.**  $^1\text{H}$ -NMR of  $\text{HC}(\text{COOHex})(\text{pz})_2$  ( $\text{L}^{\text{OHex}}$ ) in  $\text{CDCl}_3$ .

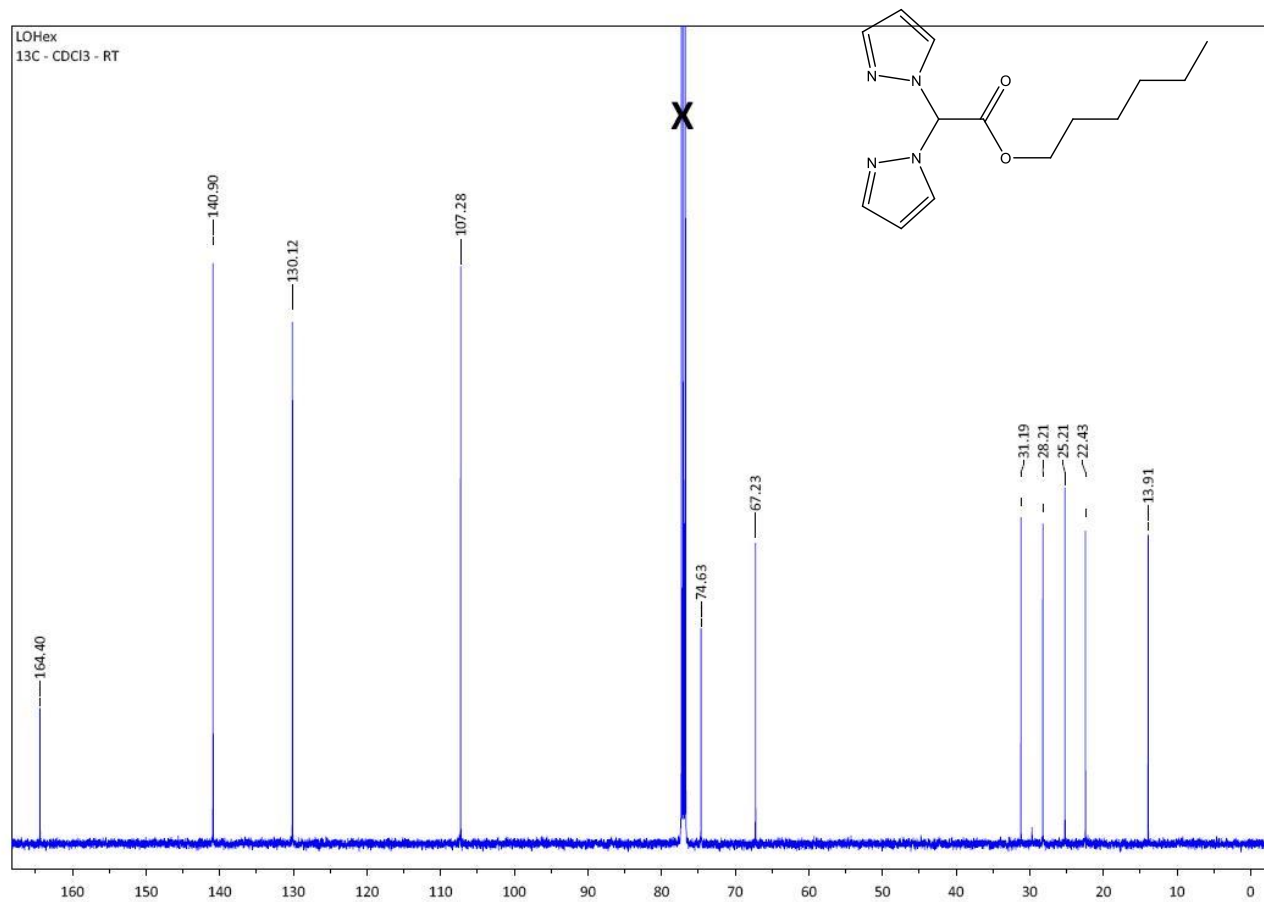

Figure S5.  $^{13}\text{C}$ -NMR of  $\text{HC}(\text{COOHex})(\text{pz})_2$  ( $\text{L}^{\text{OHex}}$ ) in  $\text{CDCl}_3$ .

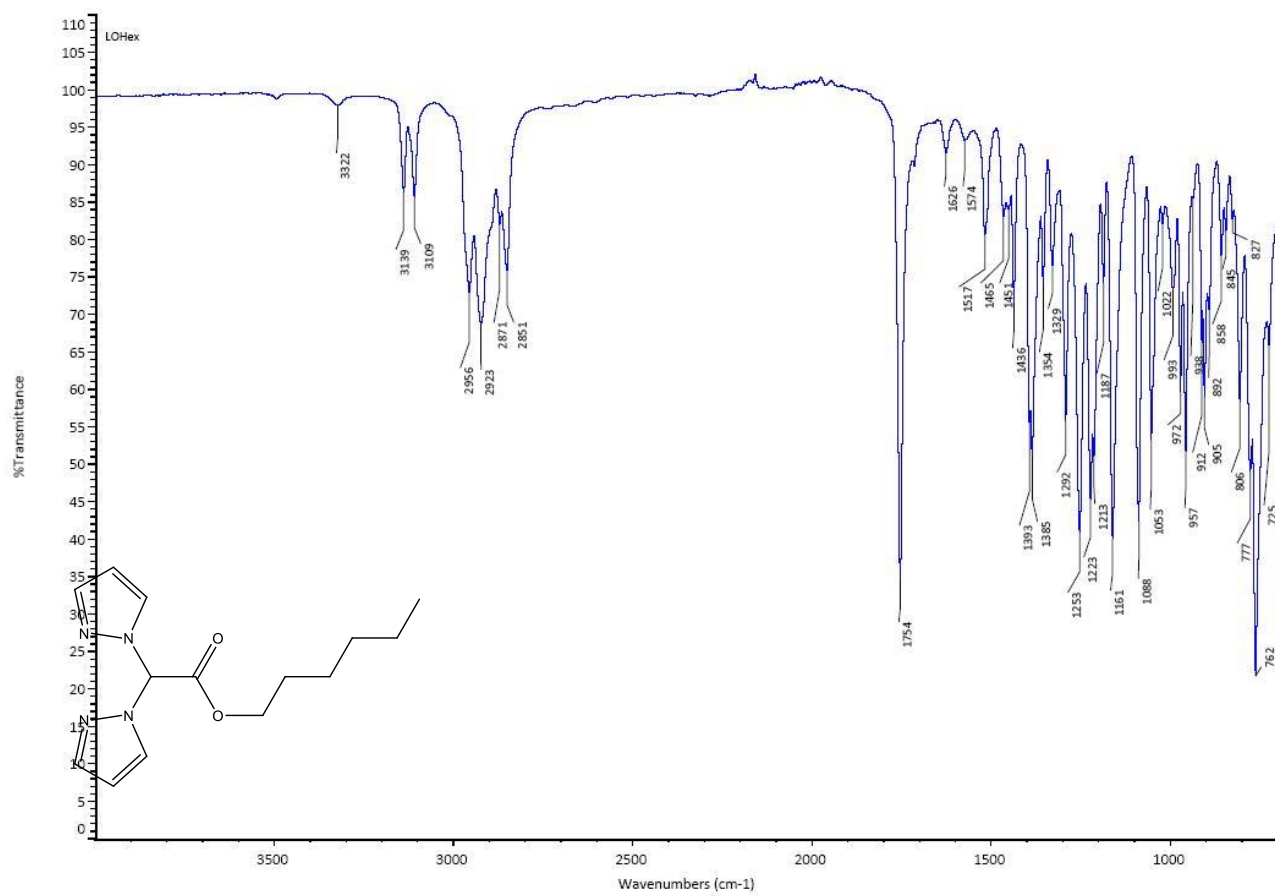

Figure S6. FT-IR spectrum of  $\text{HC}(\text{COOHex})(\text{pz})_2 (\text{LOHex})$ .

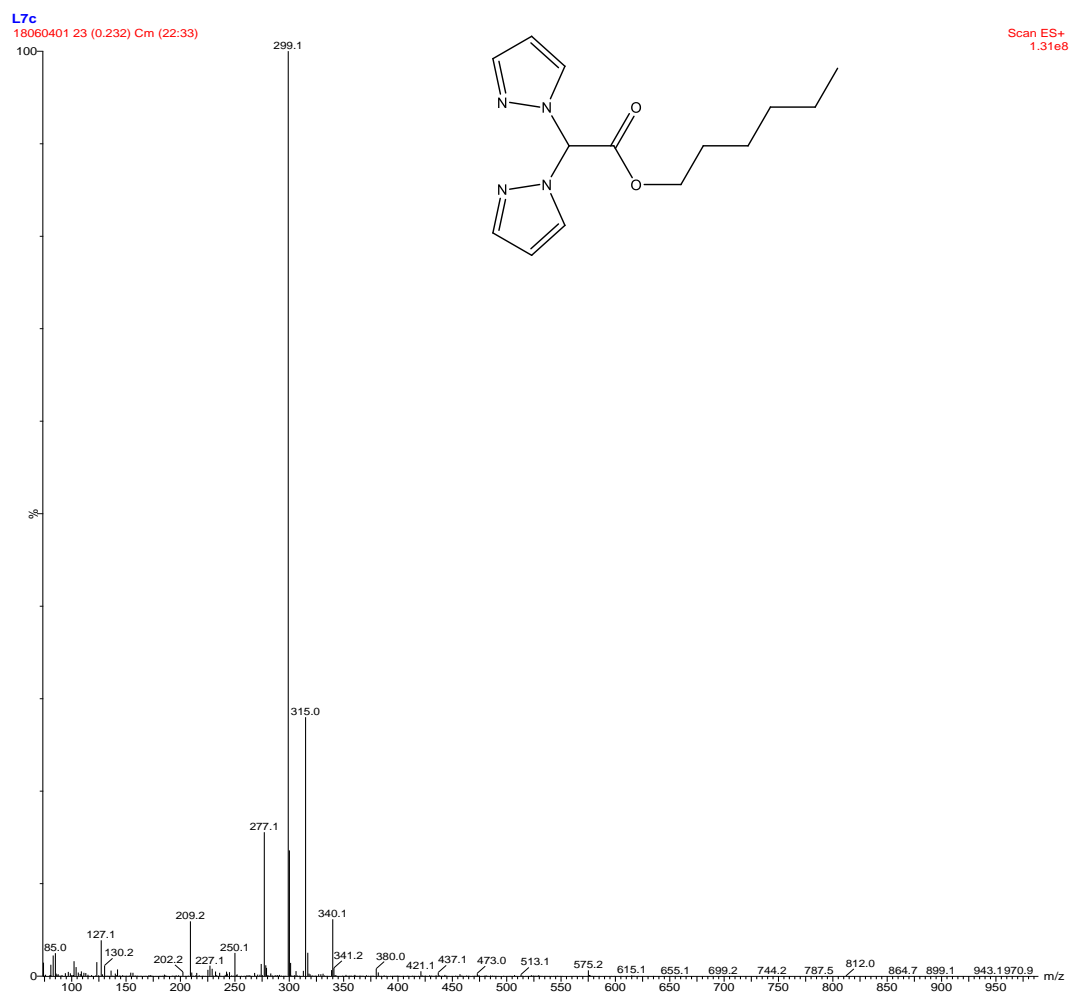

**Figure S7.** ESI-MS(+) spectrum of  $\text{HC}(\text{COOHex})(\text{pz})_2$  ( $\text{LOHex}$ ).

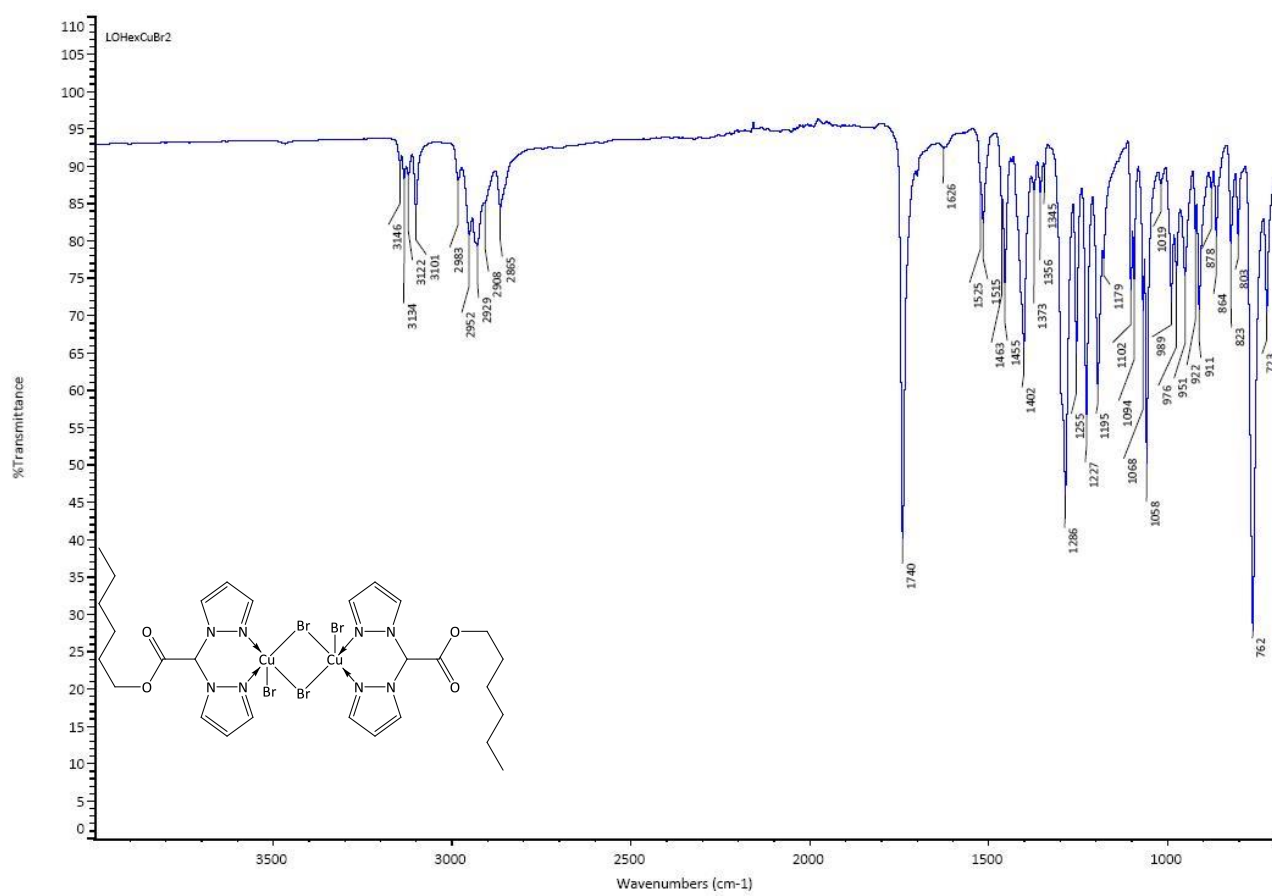

Figure S8. FT-IR spectrum of  $[\text{Cu}(\text{LOHex})\text{Br}(\mu\text{-Br})]_2$  (1).



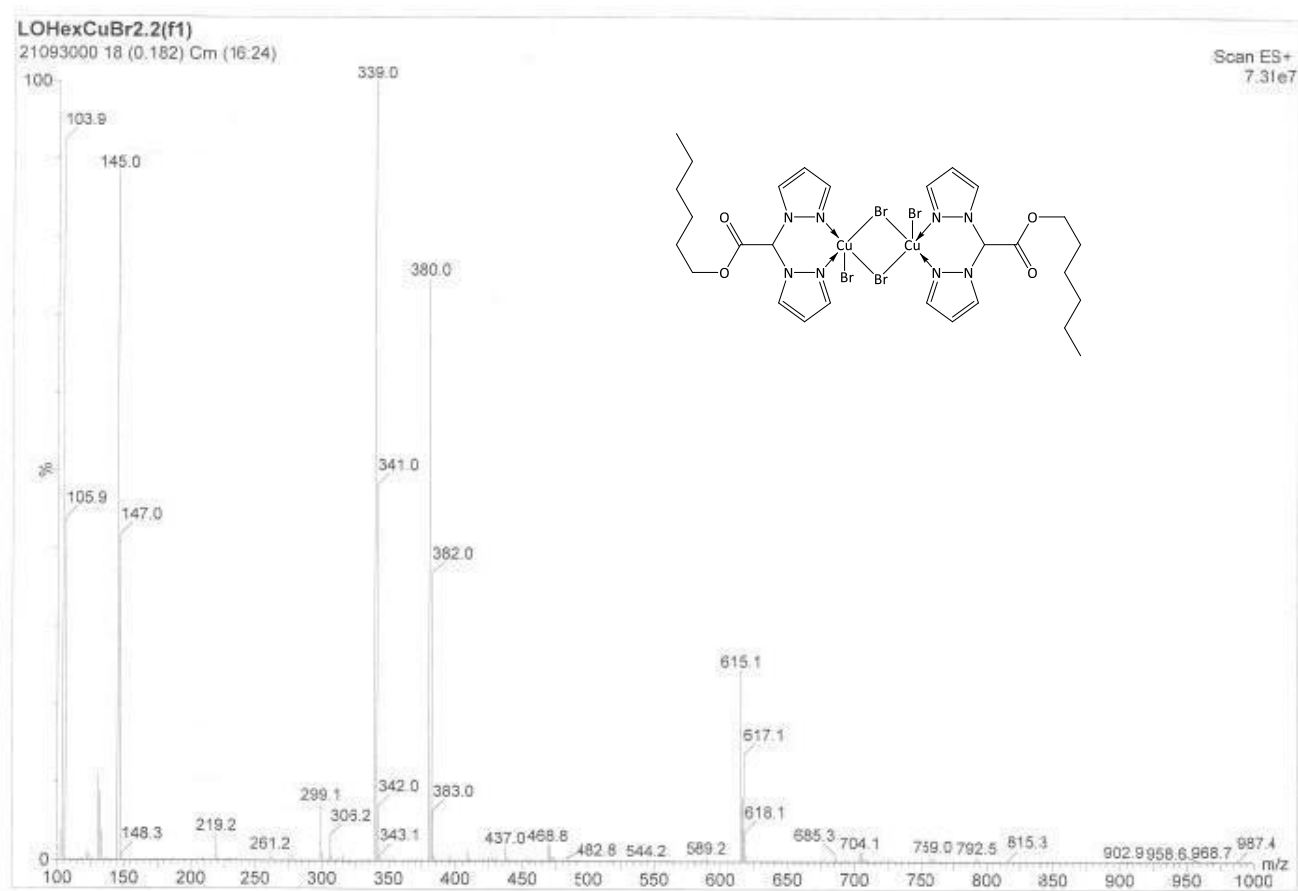

Figure S9. ESI-MS(+) spectrum of  $[\text{Cu}(\text{LOHex})\text{Br}(\mu\text{-Br})]_2$  (1).

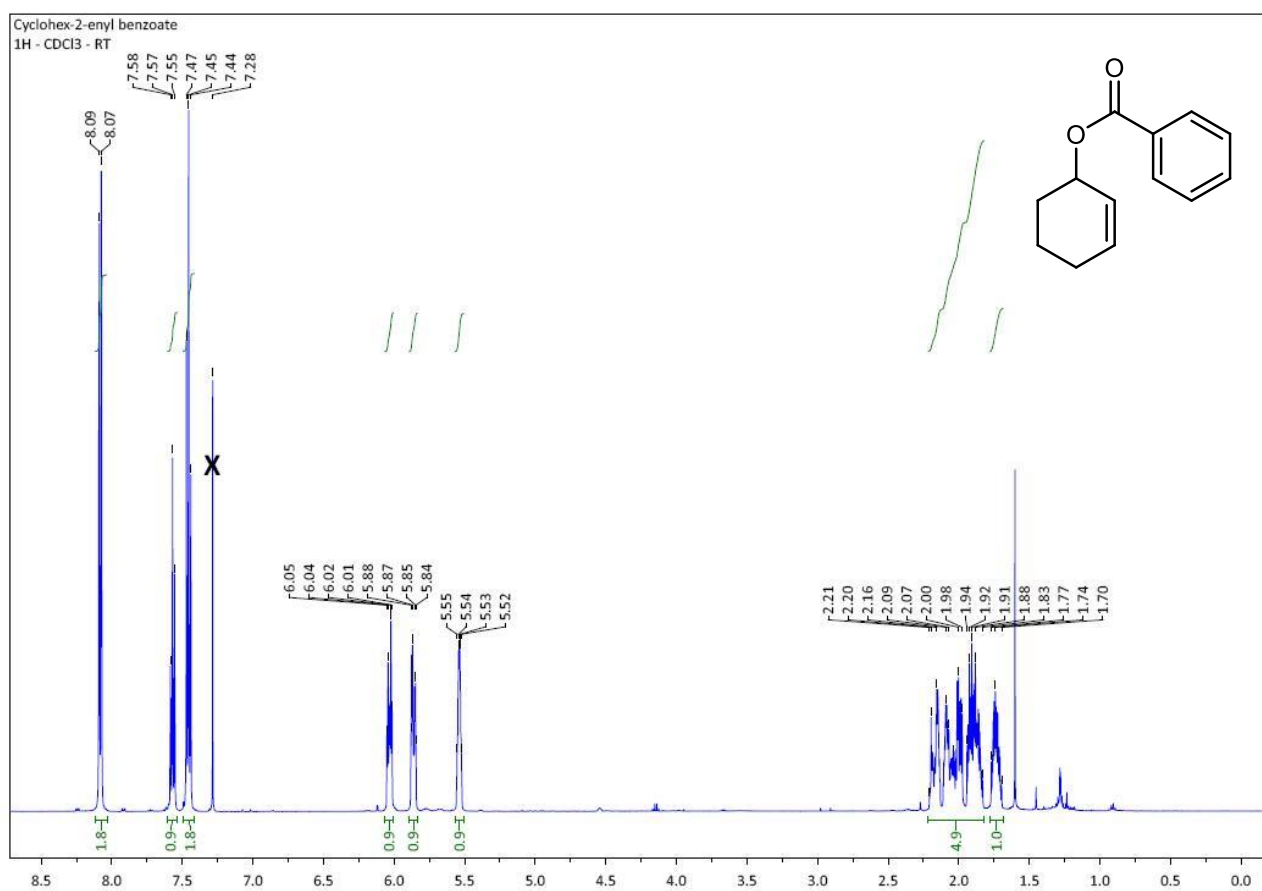

Figure S10. <sup>1</sup>H-NMR of compound **4** in CDCl<sub>3</sub>.

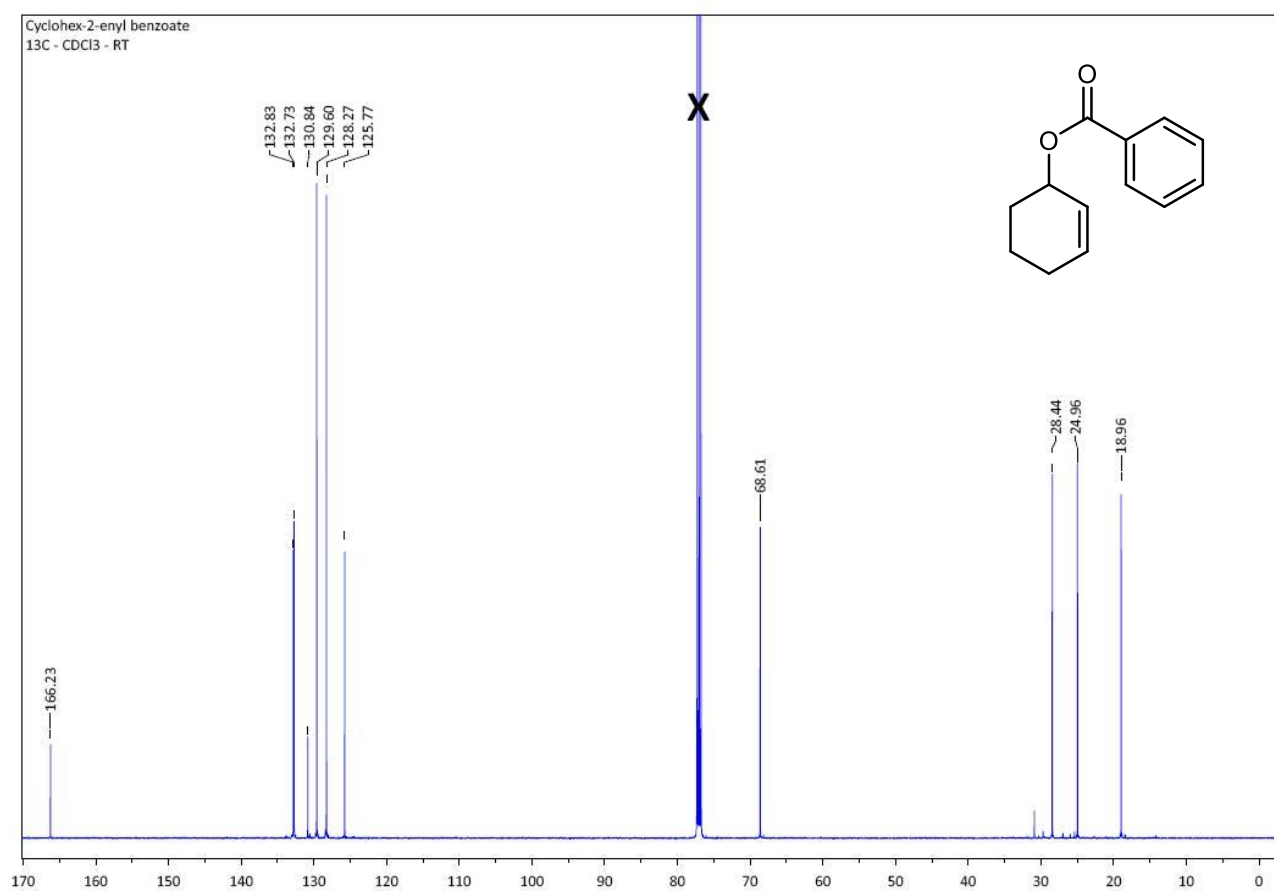

Figure S11.  $^{13}\text{C}$ -NMR of compound **4** in  $\text{CDCl}_3$ .

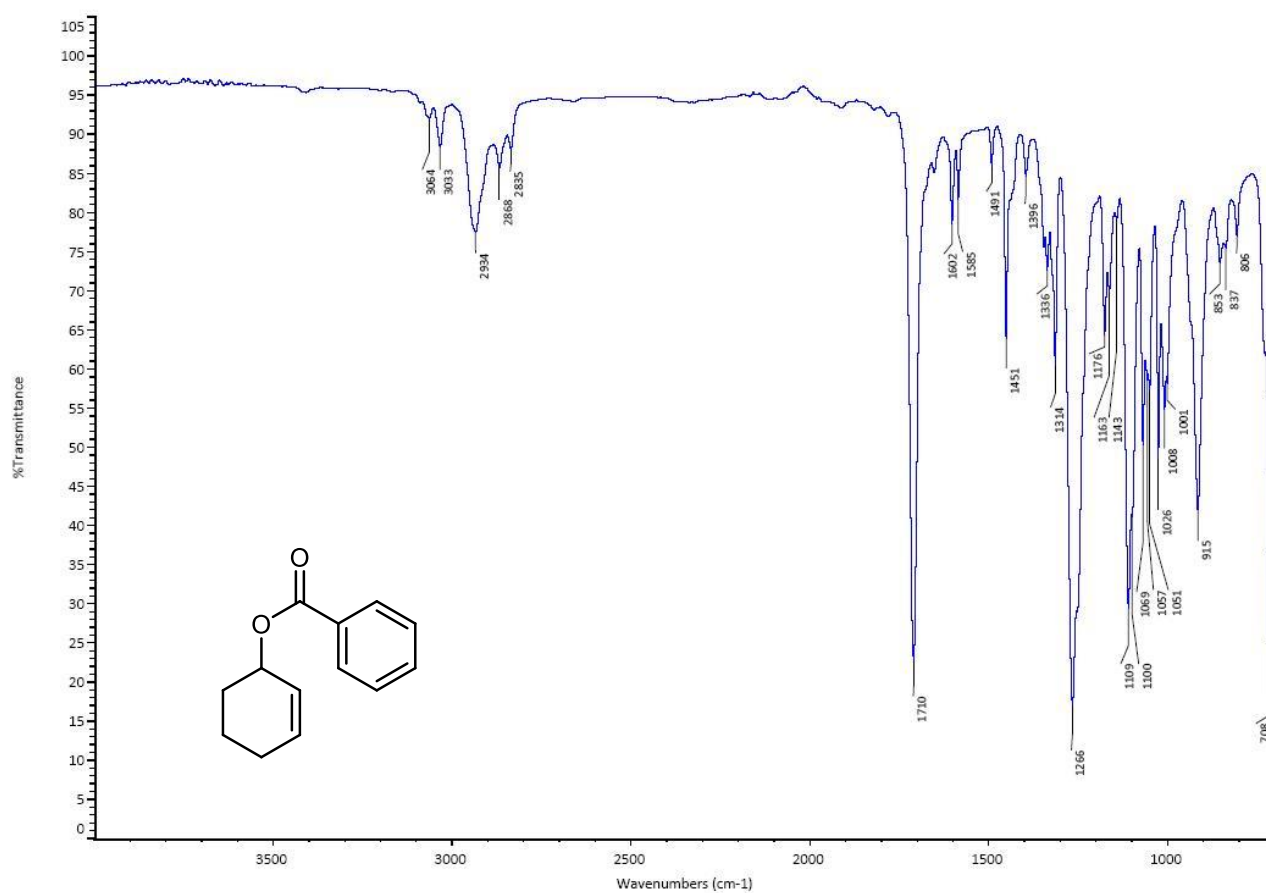

Figure S12. FT-IR spectrum of compound 4.

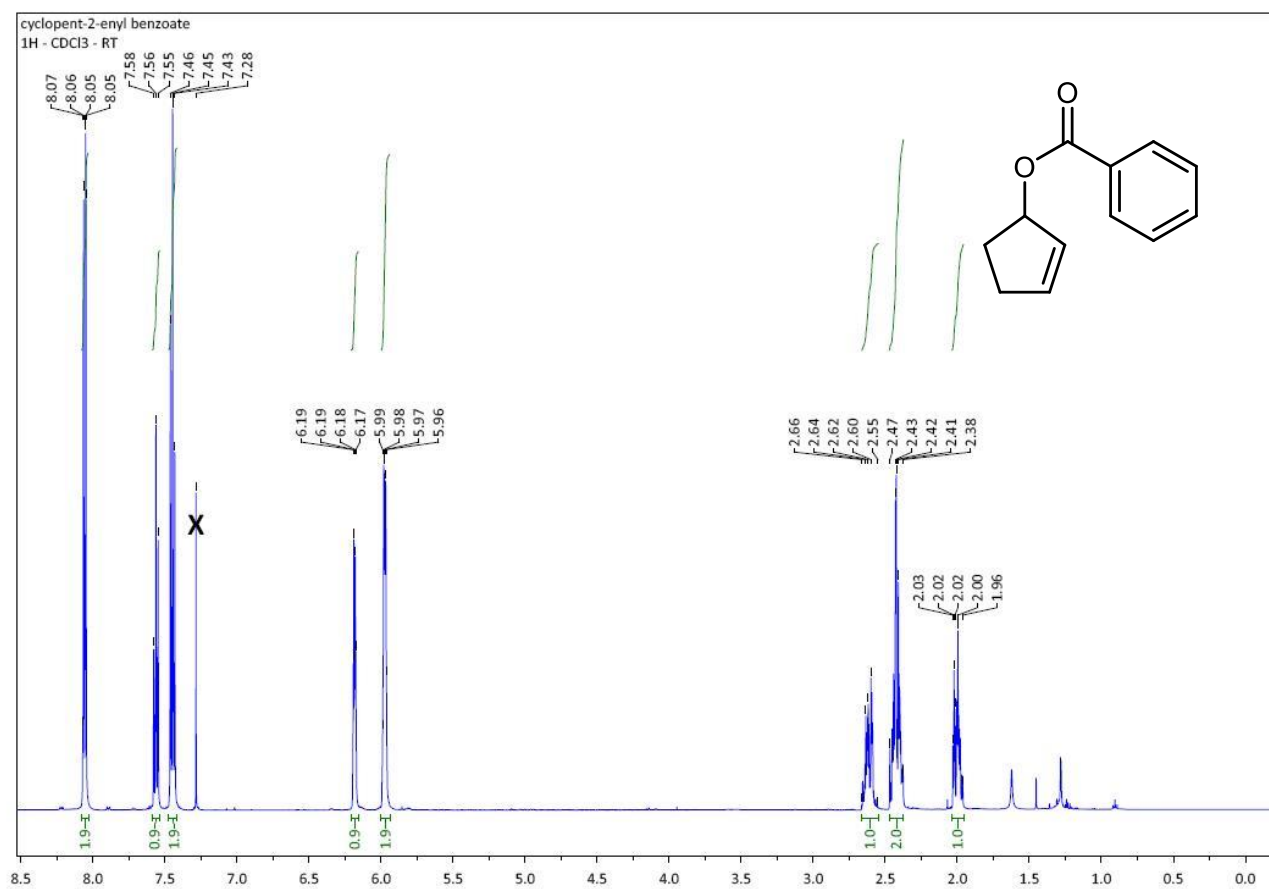

Figure S13. <sup>1</sup>H-NMR of compound 5 in CDCl<sub>3</sub>.

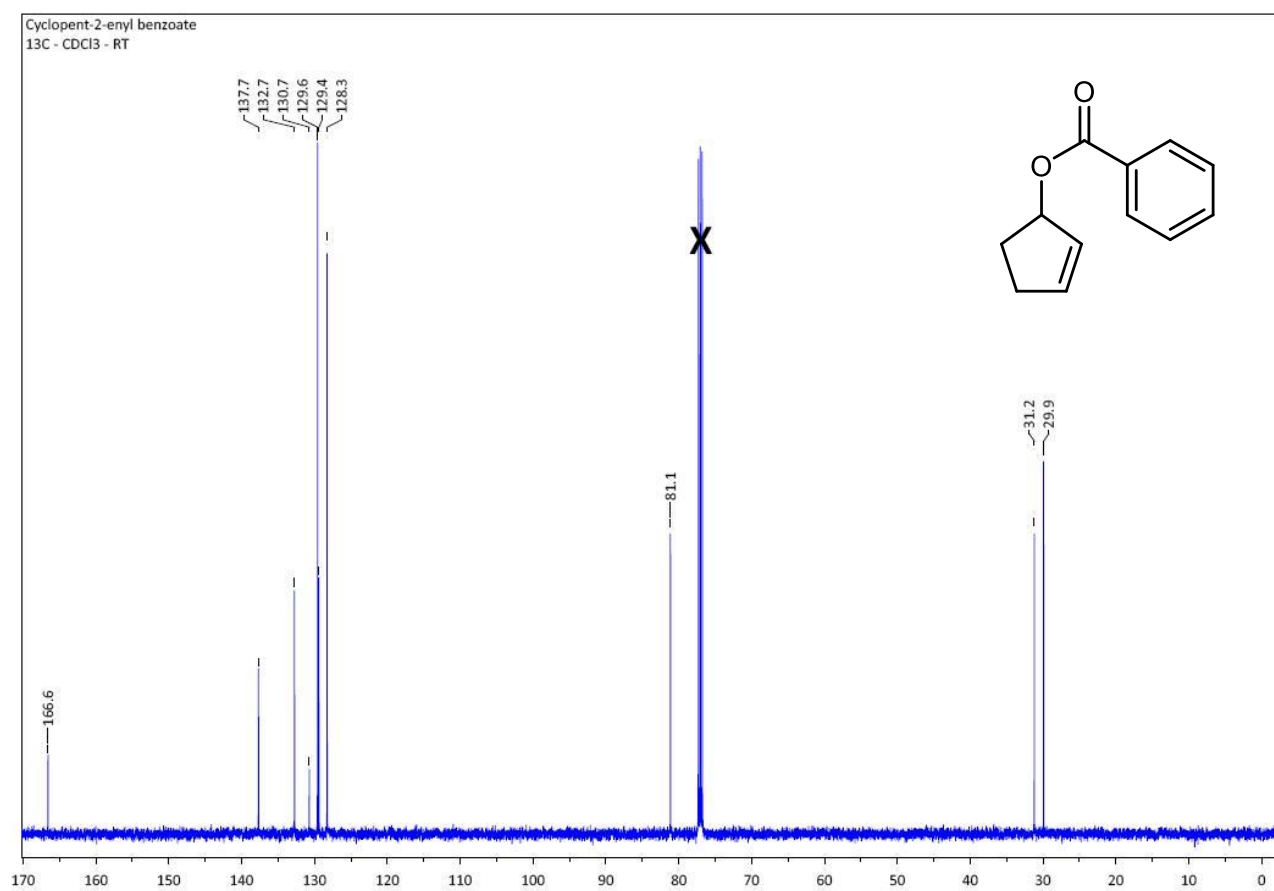

Figure S14.  $^{13}\text{C}$ -NMR of compound 5 in  $\text{CDCl}_3$ .

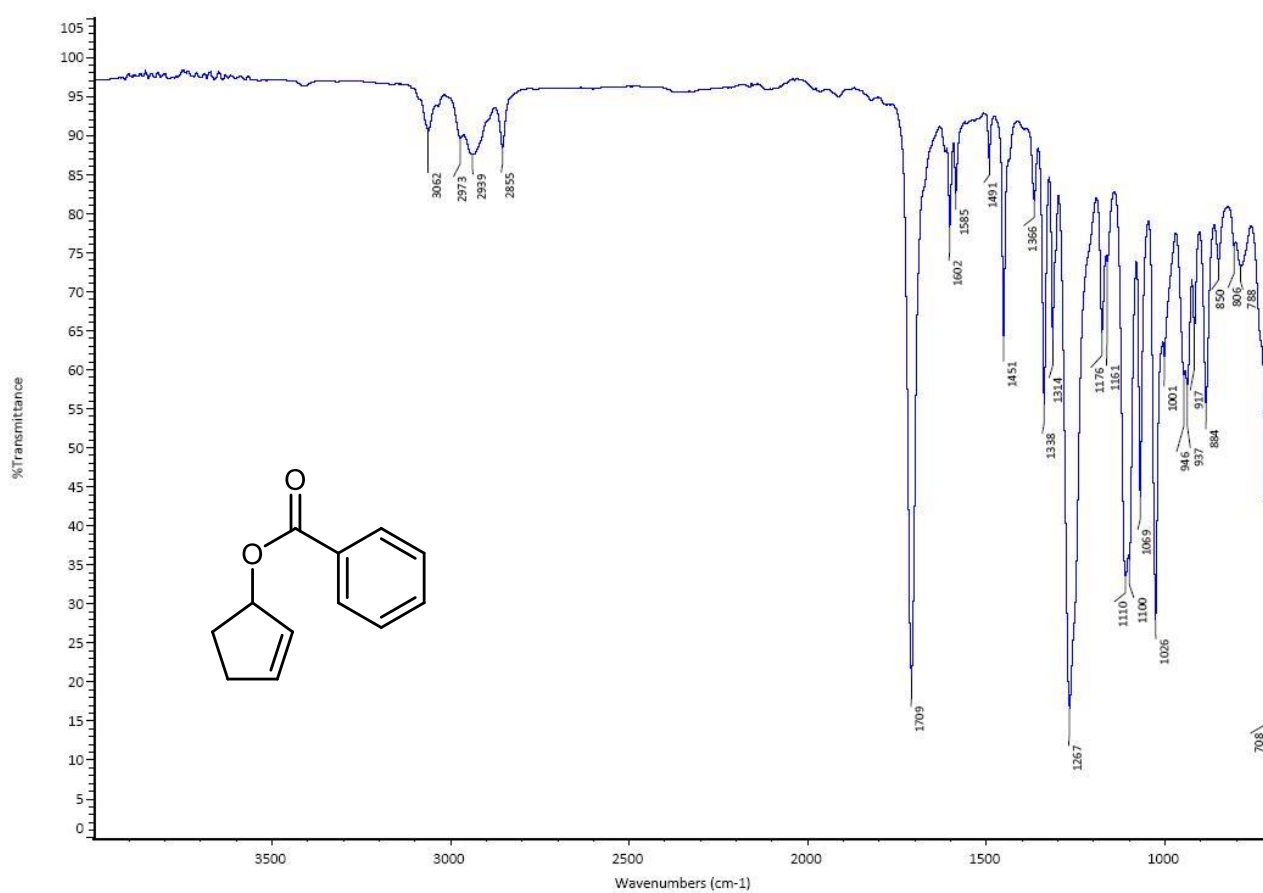

Figure S15. FT-IR spectrum of compound 5.

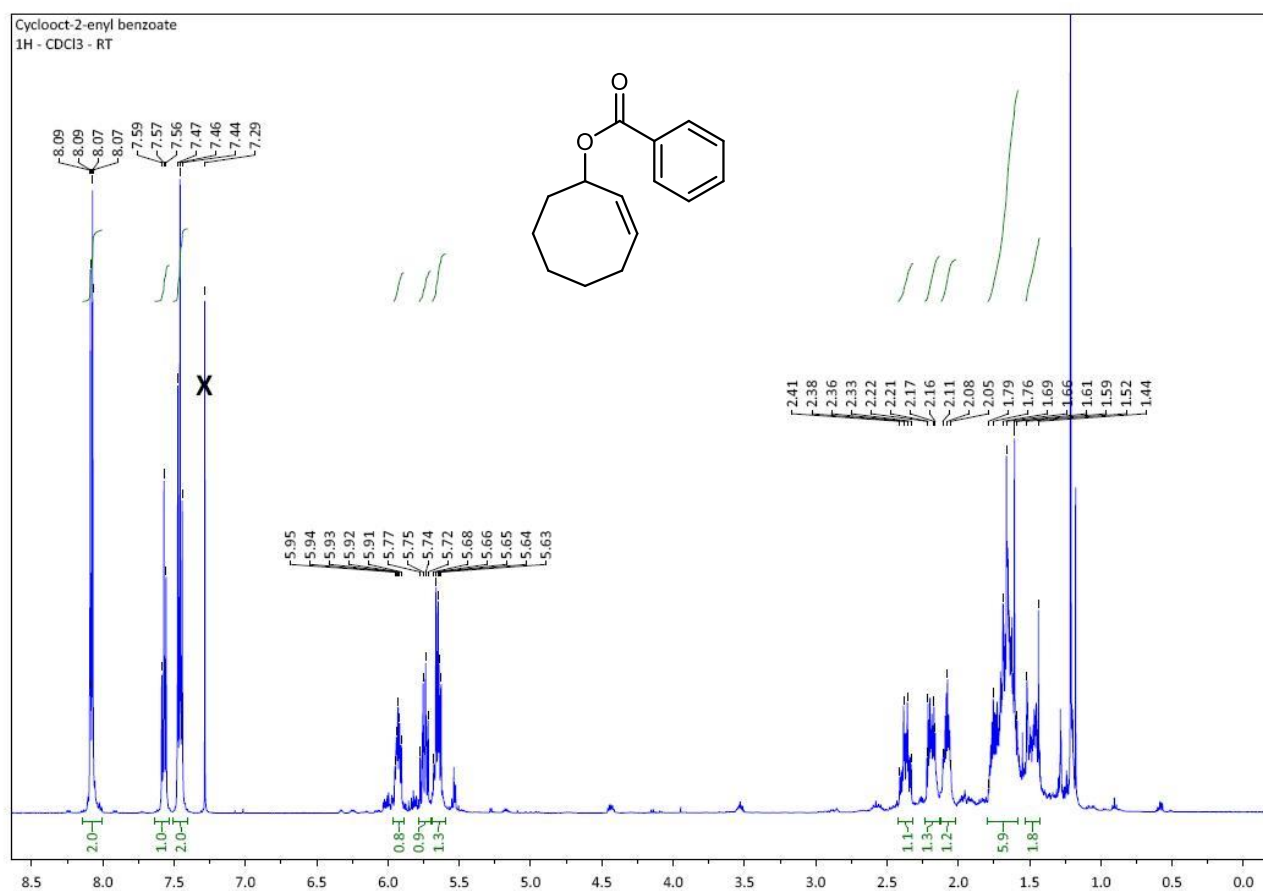

Figure S16. <sup>1</sup>H-NMR of compound 6 in CDCl<sub>3</sub>.



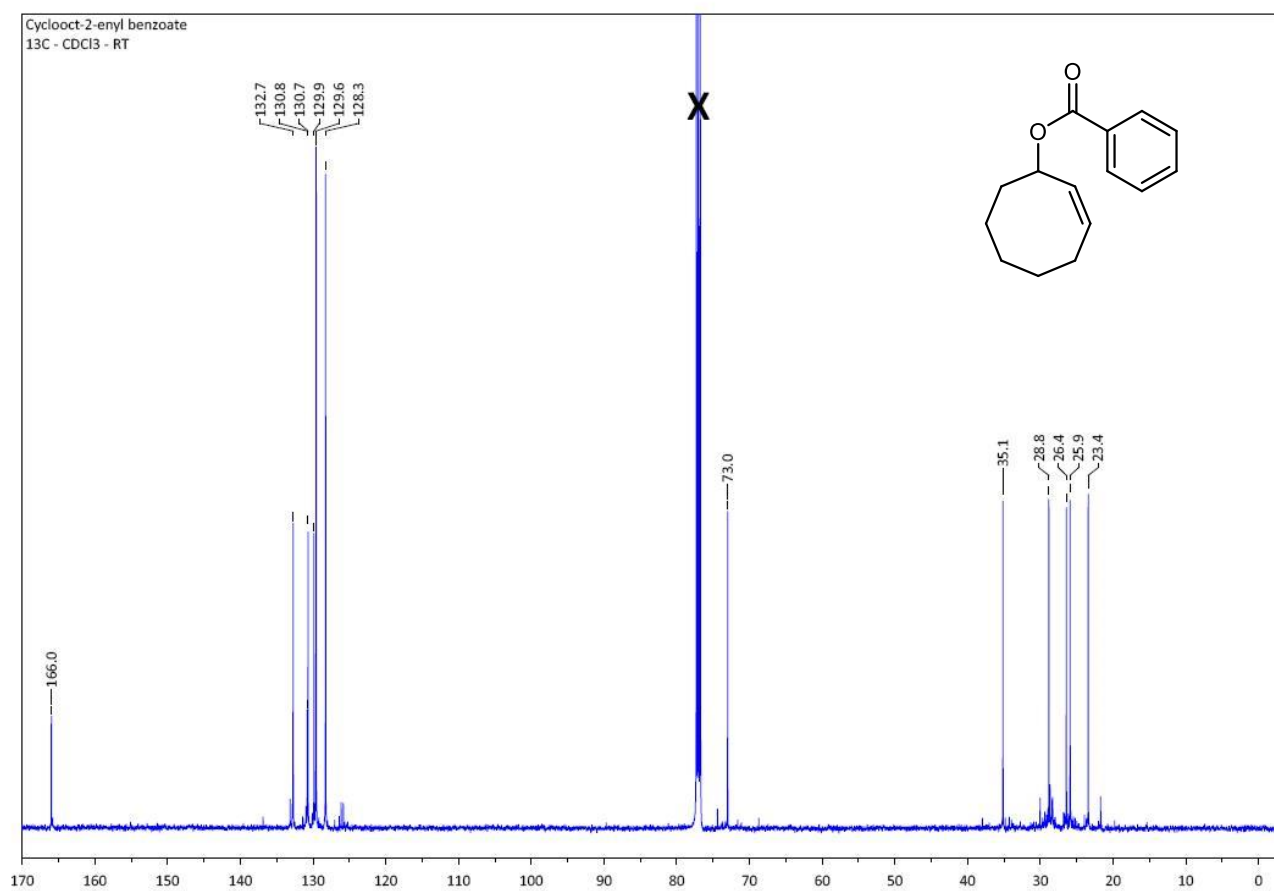

Figure S17.  $^{13}\text{C}$ -NMR of compound 6 in  $\text{CDCl}_3$ .

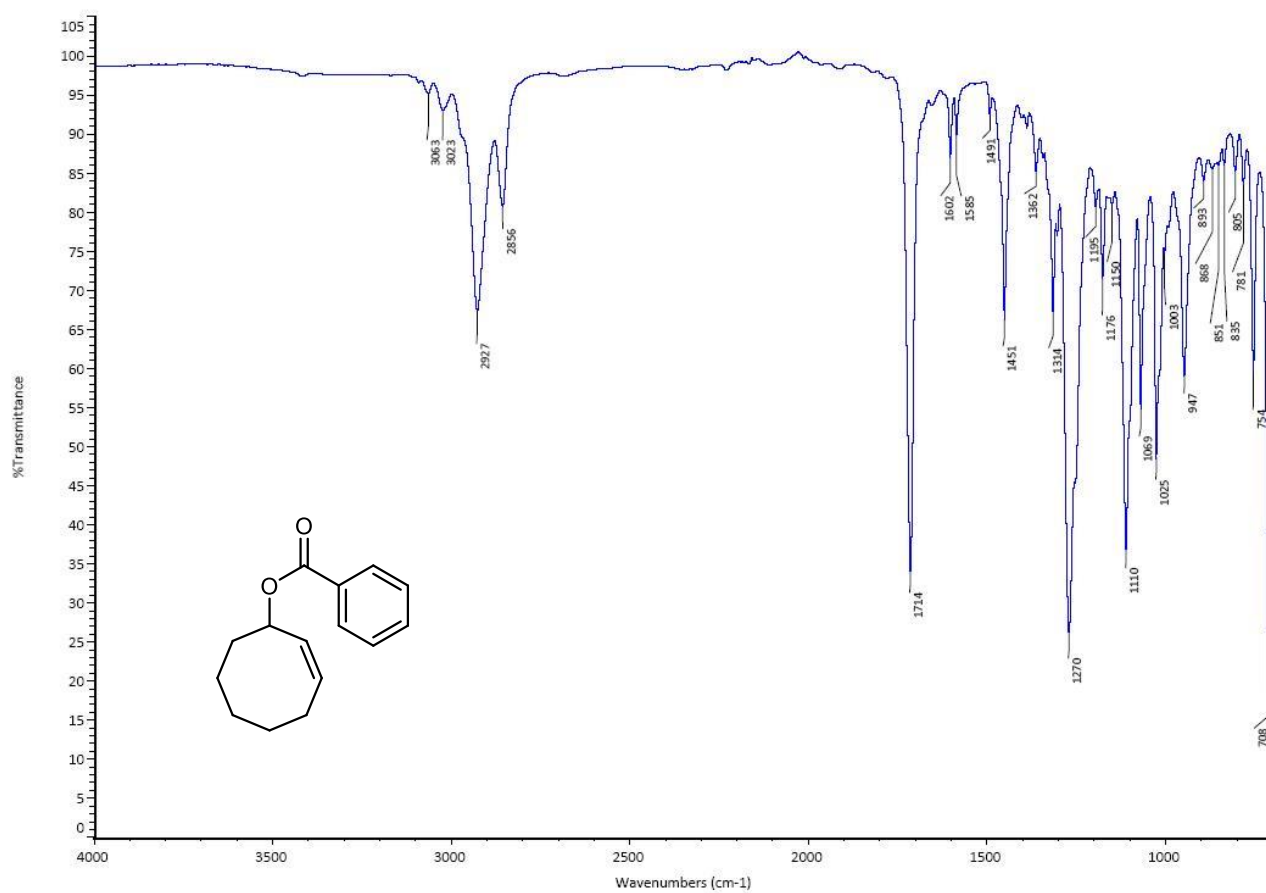

Figure S18. FT-IR spectrum of compound 6.
